# Supplementary material for: Duloxetine versus ‘active’ placebo, placebo or no intervention for major depressive disorder; a protocol for a systematic review of randomised clinical trials with meta-analysis and trial sequential analysis
Source: PubMed Central journal article supplement (PMC8191126; doi:10.1186/s13643-021-01722-5), 2021-06-09
Supplement: 13643_2021_1722_MOESM3_ESM.pdf [file 13643_2021_1722_MOESM3_ESM.pdf]

## Search strategies for duloxetine for major depressive disorder

### Cochrane Central Register of Controlled Trials (CENTRAL) in the Cochrane Library

- #1 MeSH descriptor: [Duloxetine Hydrochloride] explode all trees
- #2 (duloxetine\* or cymbalta\* or Irenka\*)
- #3 #1 or #2
- #4 MeSH descriptor: [Depressive Disorder, Major] explode all trees
- #5 MeSH descriptor: [Depressive Disorder] this term only
- #6 MeSH descriptor: [Seasonal Affective Disorder] explode all trees
- #7 MeSH descriptor: [Dysthymic Disorder] explode all trees
- #8 MeSH descriptor: [Depression] explode all trees
- #9 MeSH descriptor: [Affective Symptoms] this term only
- #10 (MDD or depress\* or ((affective or adjustment or dysthym\* or mood) and (disorder\* or disease\* or symptom\*)))
- #11 #4 or #5 or #6 or #7 or #8 or #9 or #10
- #12 #3 and #11

### MEDLINE Ovid (1946 to the date of the search)

- 1. exp Duloxetine Hydrochloride/
- 2. (duloxetine\* or cymbalta\* or Irenka\*).mp. [mp=title, abstract, original title, name of substance word, subject heading word, keyword heading word, protocol supplementary concept word, rare disease supplementary concept word, unique identifier]
- 3. 1 or 2
- 4. exp Depressive Disorder, Major/
- 5. Depressive Disorder/
- 6. exp Seasonal Affective Disorder/
- 7. exp Dysthymic Disorder/
- 8. exp Depression/
- 9. Affective Symptoms/
- 10. (MDD or depress\* or ((affective or adjustment or dysthym\* or mood) and (disorder\* or disease\* or symptom\*))).mp. [mp=title, abstract, original title, name of substance word, subject heading word, keyword heading word, protocol supplementary concept word, rare disease supplementary concept word, unique identifier]
- 11. 4 or 5 or 6 or 7 or 8 or 9 or 10
- 12. 3 and 11
- 13. (randomized controlled trial or controlled clinical trial).pt. or clinical trials as topic.sh. or trial.ti.
- 14. (random\* or blind\* or placebo\* or meta-analys\*).mp. [mp=title, abstract, original title, name of substance word, subject heading word, floating sub-heading word, keyword heading word, organism supplementary concept word, protocol supplementary concept word, rare disease supplementary concept word, unique identifier, synonyms]
- 15. 12 and (13 or 14)

### Embase Ovid (1974 to the date of the search)

- 1. exp duloxetine/
- 2. (duloxetine\* or cymbalta\* or Irenka\*).mp. [mp=title, abstract, heading word, drug trade name, original title, device manufacturer, drug manufacturer, device trade name, keyword, floating subheading]
- 3. 1 or 2
- 4. exp major depression/
- 5. depression/
- 6. exp seasonal affective disorder/
- 7. exp dysthymia/
- 8. emotional disorder/
- 9. (MDD or depress\* or ((affective or adjustment or dysthym\* or mood) and (disorder\* or disease\* or symptom\*))).mp. [mp=title, abstract, heading word, drug trade name, original title, device manufacturer, drug manufacturer, device trade name, keyword, floating subheading]

10. 4 or 5 or 6 or 7 or 8 or 9
11. 3 and 10
12. Randomized controlled trial/ or Controlled clinical study/ or trial.ti.
13. (random\* or blind\* or placebo\* or meta-analys\*).mp. [mp=title, abstract, heading word, drug trade name, original title, device manufacturer, drug manufacturer, device trade name, keyword, floating subheading word, candidate term word]
14. 11 and (12 or 13)

**PsycINFO (1806 to the date of the search)**

1. (duloxetine\* or cymbalta\* or Irenka\*).mp. [mp=title, abstract, heading word, table of contents, key concepts, original title, tests & measures]
2. exp Major Depression/
3. exp Seasonal Affective Disorder/
4. exp Dysthymic Disorder/
5. exp "DEPRESSION (EMOTION)"/
6. exp Affective Disorders/
7. (MDD or depress\* or ((affective or adjustment or dysthym\* or mood) and (disorder\* or disease\* or symptom\*))).mp. [mp=title, abstract, heading word, table of contents, key concepts, original title, tests & measures]
8. 2 or 3 or 4 or 5 or 6 or 7
9. 1 and 8
10. (random\* or blind\* or placebo\* or meta-analys\*).mp. [mp=title, abstract, heading word, table of contents, key concepts, original title, tests & measures]
11. 9 and 10

**LILACS (Bireme; 1982 to the date of the search)**

(duloxetine\$ or cymbalta\$ or Irenka\$) [Words] AND (MDD or depress\$ or ((affective or adjustment or dysthym\$ or mood) and (disorder\$ or disease\$ or symptom\$))) [Words]

**Science Citation Index Expanded (Web of Science; 1900 to the date of the search) and Conference Proceedings Citation Index – Science (Web of Science; 1990 to the date of the search)**

- #1 TS=(duloxetine\* or cymbalta\* or Irenka\*)
- #2 TS=(MDD or depress\* or ((affective or adjustment or dysthym\* or mood) and (disorder\* or disease\* or symptom\*)))
- #3 #1 AND #2
- #4 TI=(random\* or blind\* or placebo\* or meta-analys\* or trial\*) OR TS=(random\* or blind\* or placebo\* or meta-analys\*)
- #5 #3 AND #4
